# Supplementary material
Source: PubMed Central journal article supplement (PMC10372751)
Supplement: jamasurg-e232751-s002.pdf [file jamasurg-e232751-s002.pdf]

## Data Sharing Statement

Handley. For-Profit Status and Geographic Distribution of Trauma Centers in the US. *JAMA Surg.* Published July 26, 2023. doi:10.1001/jamasurg.2023.2751

### Data

**Data available:** Yes

**Data types:** Other (please specify)

**Additional Information:** Analytic Code (R Markdown File)

**How to access data:** We will share with reasonable request: [thandley@stanford.edu](mailto:thandley@stanford.edu)

**When available:** With publication

### Supporting Documents

**Document types:** Statistical/analytic code

**How to access documents:** We will share with reasonable request

**When available:** With publication

### Additional Information

**Who can access the data:** Data is publicly available

**Types of analyses:** Any

**Mechanisms of data availability:** N/A - Data is publicly available
